# Supplementary material for: Polyaniline nano-needles into electrospun bio active fibres support in vitro astrocyte response
Source: Royal Society of Chemistry journal article supplement (doi:10.1039/d1ra00596k), 2021-01-01
Supplement: d1ra00596k1.pdf [file d1ra00596k1.pdf]

## Supplementary Data (ESI)

### 2.2.2.1 Appendix to Alamar Blue, Fluorescein diacetate Viability Assay and Confocal Microscopy

AB reagent was added directly to the culture medium at 10% volume of medium contained in each sample. After 3 h of incubation, 100  $\mu$ l of AB containing medium were transferred in a 96 multi well plate for fluorescence measurement. We included a negative control (CTRL-) (only medium with 10% AB and without cells) and positive control (CTRL+) of 100% reduced AB reagent without cells. Given that AB reagent does not alter cellular viability, viability time course was evaluated on the same culture of astrocytes for each experimental trial.<sup>16</sup> Accordingly, it was calculated the proliferation rate analysis measured at different time points (3 DIV, 8 DIV). Data are plotted as the averaged percentages of reduced AB  $\pm$  Standard Error (SE), normalized with respect to the data collected at 1 DIV; it confirmed an increase in the cell growth after 8 DIV both in random and aligned samples, however the proliferation rate is higher for cells seeded on aligned samples embedded with PnNs.

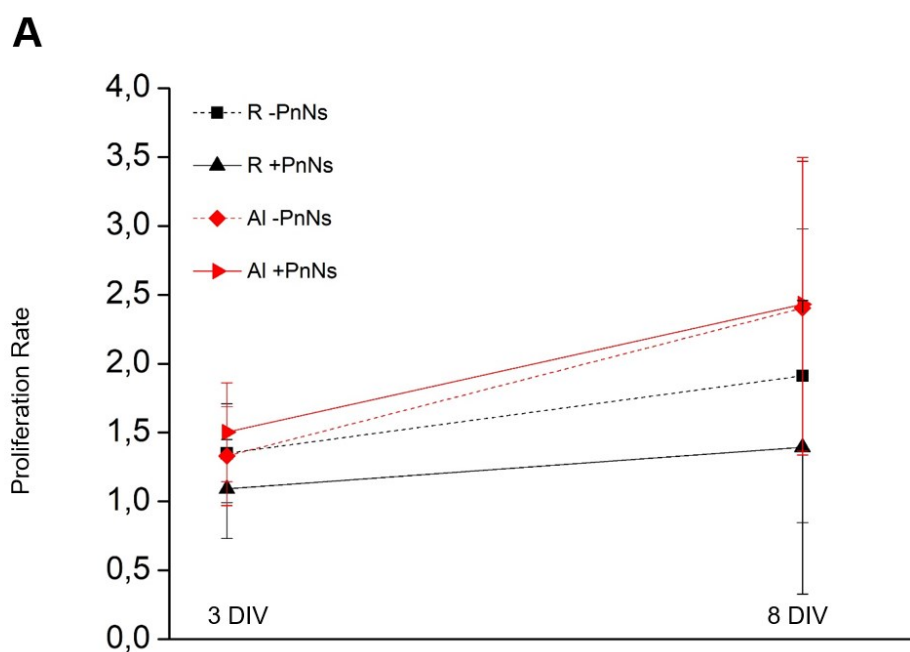

**Figure S1 A)** Proliferation rate of astrocytes seeded on random -PnNs (R -PnNs, dashed black line) and random +PnNs (R +PnNs, black line), aligned -PnNs (Al -PnNs, dashed red line) and aligned +PnNs (Al +PnNs, red line) substrates measured at different time points (3 DIV, 8 DIV). Data are plotted as the averaged percentages of reduced AB  $\pm$  Standard Error (SE), normalized with respect to the data collected at 1 DIV; Student's t-test,  $p$ val > 0.05 for all the condition tested.

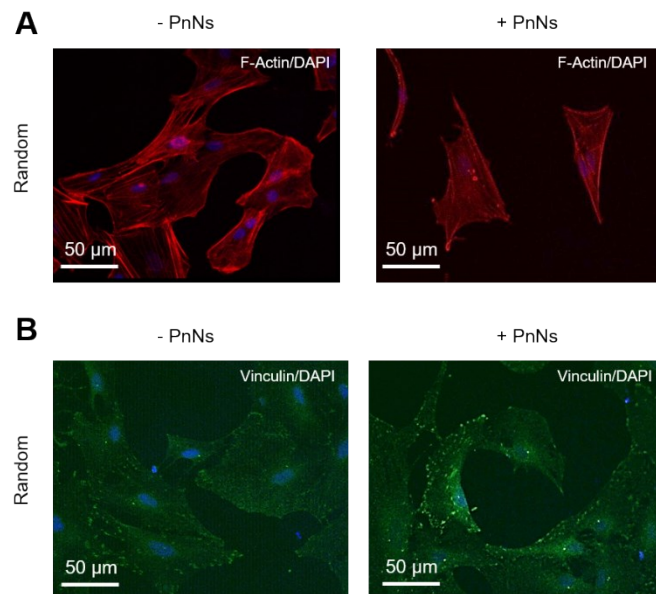

**Figure S2:** (A) Confocal images of Phalloidin-TRITC staining of the cytoskeleton (red) and with DAPI (blue) of astrocytes plated on random -PnNs, + PnNs substrates, collected after 3 DIV from the re-plating. (B) Confocal images of astrocytes plated on random -PnNs, +PnNs, substrates immune stained for Vinculin (green) and with DAPI (blue), collected after 3 DIV from the re-plating.

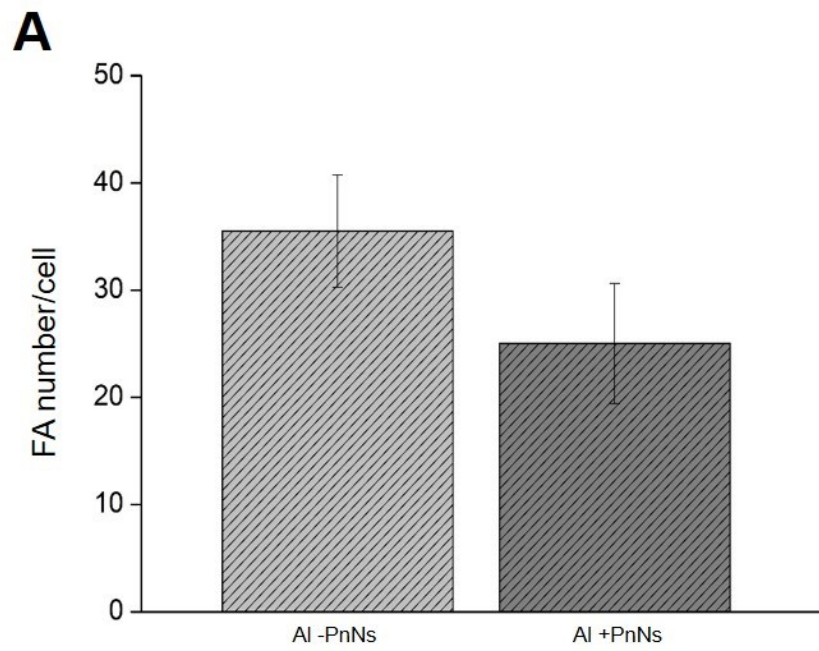

**Figure S3: A)** Bar plot shows the number of vinculin contacts per cell, counted after 3 DIV from the cells re-plating in cells plated on aligned -PnNs and +PnNs substrates. Data are expressed as means. S.E. (AI -PnNs n=138; AI +PnNs n=90). Student's t-test, \* =pval<0.05, \*\* =pval<0.01, \*\*\*=pval<0.001.

### 2.2.3.1 Appendix to Electrophysiology and functional properties

Membrane currents were amplified, filtered at 2 kHz and acquired at a sample rate of 5 kHz by Axo patch 200B amplifier in voltage-clamp mode. Responses were amplified, low-pass filtered at 1 kHz, digitised at 20 kHz, stored and analysed with p CLAMP 10. Experiments were carried out at room temperature (22–24°C). Current amplitude was recorded, and values of the resting membrane potential ( $V_{\text{mem}}$ ), input resistance (IR), specific conductance (SG) and capacitance ( $C_p$ ) were calculated as described previously.<sup>17</sup> Patch pipettes were prepared from thin walled borosilicate capillaries (Harvard Apparatus) to have a tip resistance of 2-4 M $\Omega$  when filled with the standard internal solution.

|       | $C_p$ (pF)      | $V_{\text{mem}}$ (mV) | SG (ns/pF)      | IR (M $\Omega$ )  | I (pA/pF)<br>-120mV | I (pA/pF)<br>+60mV |
|-------|-----------------|-----------------------|-----------------|-------------------|---------------------|--------------------|
| -PANi | 64.9 $\pm$ 10.1 | -49.7 $\pm$ 7.1       | 0.04 $\pm$ 0.01 | 812.3 $\pm$ 293.3 | -4.4 $\pm$ 0.7      | 45.6 $\pm$ 4.5     |
| +PANi | 38.0 $\pm$ 2.5* | -41.0 $\pm$ 3.3       | 0.05 $\pm$ 0.01 | 838.9 $\pm$ 137.9 | -4.1 $\pm$ 0.5      | 48.9 $\pm$ 4.1     |

**Table S1** Electrophysiological properties of astrocytes plated on aligned -PANi and +PANi substrates.  $C_p$ , membrane capacitance;  $V_{\text{mem}}$ , resting membrane potential; SG, mean specific conductance; IR, input resistance; I, current density.  $n=12$  for -PANi and  $n=16$  for +PANi (ANOVA test,  $p_{\text{val}} > 0.05$ ).

### 2.2.3.2 Solutions and chemicals

All salts and chemicals employed for the investigations were of the highest purity grade (Sigma). For electrophysiological experiments, the standard bath saline was (mM): 140 NaCl, 4 KCl, 2 MgCl<sub>2</sub>, 2 CaCl<sub>2</sub>, 10 HEPES, 5 Glucose, pH 7.4 with NaOH and osmolarity adjusted to 315 mOsm with mannitol. The intracellular (pipette) solution was composed of (mM): 144 KCl, 2 MgCl<sub>2</sub>, 5 EGTA, 10 HEPES, pH 7.2 with KOH and osmolarity 300 mOsm. When using external solutions with different ionic compositions, salts were replaced equimolarly.
